# Supplementary material for: Cutaneous allodynia as predictor for treatment response in chronic migraine: a cohort study
Source: PubMed Central journal article supplement (PMC10466691; doi:10.1186/s10194-023-01651-9), 2023-08-30
Supplement: 10194_2023_1651_MOESM1_ESM.pdf [file 10194_2023_1651_MOESM1_ESM.pdf]

**Table S1.** Participants with no allodynia vs participants with at least one symptom of the different types of allodynia.

| <b>Outcome</b>     | <b>No allodynia*</b><br>(n=27) | <b>Cephalic allodynia</b><br>(n=79) | <b>Extracerebral allodynia</b><br>(n=67) | <b>Thermal allodynia</b><br>(n=16) | <b>Mechanical allodynia</b><br>(n=16) | <b>Thermal + mechanical allodynia</b><br>(n=114) |
|--------------------|--------------------------------|-------------------------------------|------------------------------------------|------------------------------------|---------------------------------------|--------------------------------------------------|
| Reversion CM to EM | 23 (85.2%)                     | 49 (62.0%)                          | 35 (52.2%)                               | 12 (75.0%)                         | 8 (50.0%)                             | 64 (56.1%)                                       |
| 50% reduction MMD  | 18 (66.7%)                     | 37 (46.8%)                          | 28 (41.8%)                               | 7 (43.8%)                          | 6 (37.5%)                             | 52 (45.6%)                                       |

Values are n (%). CM: chronic migraine; EM: episodic migraine; MMD: monthly migraine days. \* Patients without a single symptoms of allodynia on the Allodynia Symptom Checklist.

**Table S2.** Allodynia as a predictor for the odds on  $\geq 50\%$  response in migraine days, i.e. a reduction in monthly migraine days of 50% or more.

|                                                      | <i>Overall allodynia</i> |                      |              | <i>Spatial distribution</i> |                       |              | <i>Type of stimulus</i> |                       |              |
|------------------------------------------------------|--------------------------|----------------------|--------------|-----------------------------|-----------------------|--------------|-------------------------|-----------------------|--------------|
|                                                      | Multivariate<br>CI)      | OR<br>(95%<br>CI)    | <i>p</i>     | Multivariate<br>CI)         | OR<br>(95%<br>CI)     | <i>p</i>     | Multivariate<br>CI)     | OR<br>(95%<br>CI)     | <i>p</i>     |
| No allodynia <i>versus</i> allodynia                 | <b>2.28</b>              | <b>(1.01 ; 5.16)</b> | <b>0.048</b> |                             |                       |              |                         |                       |              |
| No allodynia<br><i>versus</i> cephalic allodynia     |                          |                      |              | <b>3.88</b>                 | <b>(1.33; 11.35)</b>  | <b>0.013</b> |                         |                       |              |
| <i>versus</i> extracephalic allodynia                |                          |                      |              | <b>6.17</b>                 | <b>(1.85 ; 19.45)</b> | <b>0.002</b> |                         |                       |              |
| No allodynia<br><i>versus</i> thermal allodynia only |                          |                      |              |                             |                       |              | <b>4.57</b>             | <b>(1.12 ; 18.69)</b> | <b>0.035</b> |
| <i>versus</i> mechanical + thermal allodynia         |                          |                      |              |                             |                       |              | <b>4.34</b>             | <b>(1.49 ; 12.64)</b> | <b>0.007</b> |
| <i>versus</i> mechanical allodynia only              |                          |                      |              |                             |                       |              | <b>6.47</b>             | <b>(1.52 ; 27.55)</b> | <b>0.012</b> |

Adjusted for: gender, age, depression and anxiety.

**Table S3.** Allodynia as a predictor for the odds to revert from chronic migraine to episodic migraine.

|                                                           | <i>Overall allodynia</i> |               |       | <i>Spatial distribution</i> |                       | <i>Type of stimulus</i>    |              |
|-----------------------------------------------------------|--------------------------|---------------|-------|-----------------------------|-----------------------|----------------------------|--------------|
|                                                           | Multivariate OR (95% CI) | <i>p</i>      |       | Multivariate OR (95% CI)    | <i>p</i>              | Multivariate OR (95% CI)   | <i>p</i>     |
| No allodynia <i>versus</i> allodynia                      | 2.37                     | (0.99 ; 5.64) | 0.053 |                             |                       |                            |              |
| No allodynia <i>versus</i> cephalic allodynia             |                          |               |       | <b>4.06</b>                 | <b>(1.17; 14.00)</b>  | <b>0.027</b>               |              |
| No allodynia <i>versus</i> extracephalic allodynia        |                          |               |       | <b>7.05</b>                 | <b>(1.89 ; 26.31)</b> | <b>0.004</b>               |              |
| No allodynia <i>versus</i> thermal allodynia only         |                          |               |       |                             |                       | 2.36 (0.47 ; 11.94)        | 0.299        |
| No allodynia <i>versus</i> mechanical + thermal allodynia |                          |               |       |                             |                       | <b>5.45 (1.57 ; 18.88)</b> | <b>0.008</b> |
| No allodynia <i>versus</i> mechanical allodynia only      |                          |               |       |                             |                       | <b>7.18 (1.50 ; 34.26)</b> | <b>0.013</b> |

Adjusted for: gender, age, botulinum toxin A injections, depression and anxiety.

**Table S4.** Allodynia as a predictor for reduction in monthly migraine days (MMD) and monthly headache days (MHD).

|                                                      | <i>Overall allodynia</i> |                      |              | <i>Spatial distribution</i> |                |             | <i>Type of stimulus</i> |              |          |
|------------------------------------------------------|--------------------------|----------------------|--------------|-----------------------------|----------------|-------------|-------------------------|--------------|----------|
|                                                      | Difference (95% CI)      |                      | <i>p</i>     | Difference (95% CI)         |                | <i>p</i>    | Difference (95% CI)     |              | <i>p</i> |
| <b>Reduction in MMD</b>                              |                          |                      |              |                             |                |             |                         |              |          |
| Allodynia (no allodynia vs allodynia)                | <b>3.63</b>              | <b>(1.08 ; 6.18)</b> | <b>0.005</b> |                             |                |             |                         |              |          |
| No allodynia<br><i>versus</i> cephalic allodynia     | <b>3.46</b>              | <b>(0.35 ; 6.58)</b> | <b>0.029</b> |                             |                |             |                         |              |          |
| <i>versus</i> extracephalic allodynia                | <b>5.14</b>              | <b>(1.76 ; 8.52)</b> | <b>0.003</b> |                             |                |             |                         |              |          |
| No allodynia<br><i>versus</i> thermal allodynia only |                          |                      |              |                             |                | 2.09        | (-2.12 ; 6.29)          | 0.331        |          |
| <i>versus</i> mechanical + thermal allodynia         |                          |                      |              |                             |                | <b>4.31</b> | <b>(1.19 ; 7.43)</b>    | <b>0.007</b> |          |
| <i>versus</i> mechanical allodynia only              |                          |                      |              |                             |                | <b>5.46</b> | <b>(1.10 ; 9.83)</b>    | <b>0.014</b> |          |
| <b>Reduction in MHD</b>                              |                          |                      |              |                             |                |             |                         |              |          |
| Allodynia (no allodynia vs allodynia)                | 1.12                     | (-1.19 ; 3.43)       | 0.34         |                             |                |             |                         |              |          |
| No allodynia<br><i>versus</i> cephalic allodynia     |                          |                      |              | 1.95                        | (-0.87 ; 4.78) | 0.176       |                         |              |          |
| <i>versus</i> extracephalic allodynia                |                          |                      |              | 2.41                        | (-0.66 ; 5.47) | 0.124       |                         |              |          |
| No allodynia<br><i>versus</i> thermal allodynia only |                          |                      |              |                             |                | 2.49        | (-1.31 ; 6.29)          | 0.200        |          |
| <i>versus</i> mechanical + thermal allodynia         |                          |                      |              |                             |                | 1.98        | (-0.85 ; 4.81)          | 0.169        |          |
| <i>versus</i> mechanical allodynia only              |                          |                      |              |                             |                | 2.33        | (-1.62 ; 6.28)          | 0.248        |          |

MHD: monthly headache days; MMD: monthly migraine days. Adjusted for: gender, age, botulinum toxin A injections, depression and anxiety.
